# Supplementary material for: Amino acid sequence assignment from single molecule peptide sequencing data using a two-stage classifier
Source: PubMed Central journal article supplement (PMC10256185; doi:10.1371/journal.pcbi.1011157), 2023-05-30
Supplement: pcbi.1011157.s001.pdf [file pcbi.1011157.s001.pdf]

|                             |                                                                                                                        |
|-----------------------------|------------------------------------------------------------------------------------------------------------------------|
| $\mathbf{f}^{(t)}$          | Cumulative probabilities for each state at timestep $t$                                                                |
| $\hat{\mathbf{f}}^{(t)}$    | Tensor form of $\mathbf{f}^{(t)}$                                                                                      |
| $\mathbf{O}^{(t)}$          | HMM Emission matrix for timestep $t$                                                                                   |
| $\mathcal{O}^{(t)}$         | Tensor form of $\mathbf{O}^{(t)}$                                                                                      |
| $\hat{\mathcal{O}}^{(t)}$   | A pruned approximation of $\mathcal{O}^{(t)}$                                                                          |
| $\mathbf{T}$                | The HMM transition matrix                                                                                              |
| $\mathcal{T}$               | Tensor form of $\mathbf{T}$                                                                                            |
| $\hat{\mathcal{T}}^{(t)}$   | A pruned approximation of $\mathcal{T}$ at timestep $t$                                                                |
| $T$                         | The number of timesteps                                                                                                |
| $Y_{1:T}$                   | Random variables representing the series of observations                                                               |
| $y_{1:T}$                   | The true values of $Y_{1:T}$                                                                                           |
| $X_{1:T}$                   | Random variables representing the state of the HMM across time                                                         |
| $Z$                         | Random variable representing the peptide                                                                               |
| $z$                         | True value of $Z$                                                                                                      |
| $s$                         | The number of states of a fluorophore                                                                                  |
| $\Lambda$                   | The number of fluorophores                                                                                             |
| $C$                         | The number of colors of fluorophore                                                                                    |
| $\Lambda_c$                 | The number of fluorophores of color $c$                                                                                |
| $\rho$                      | Number of amino acids successfully removed by Edman degradation                                                        |
| $\bar{c}$                   | Color of N-terminal amino acid                                                                                         |
| $\lambda_{\rho,c}$          | Number of amino acids which can accept a label of color $c$ when $\rho$ amino acids have been removed from the peptide |
| $\phi_c$                    | Number of functioning fluorophores of color $c$ remaining for the peptide                                              |
| $\alpha$                    | Number of amino acids in the peptide (before sequencing)                                                               |
| $p_c$                       | Fluorophore loss rate for color $c$                                                                                    |
| $\mathcal{B}^{(c)}$         | A factored component of $\mathcal{T}$ representing loss of fluorophores of color $c$                                   |
| $\hat{\mathcal{B}}^{(t,c)}$ | A pruned approximation of $\hat{\mathcal{B}}^{(c)}$ at timestep $t$                                                    |
| $e$                         | Edman cycle failure rate                                                                                               |
| $\mathcal{E}$               | A factored component of $\mathcal{T}$ representing Edman degradation success and failure                               |
| $\hat{\mathcal{E}}^{(t)}$   | A pruned approximation of $\mathcal{E}$ at timestep $t$                                                                |
| $d$                         | Peptide detachment rate                                                                                                |
| $\mathcal{D}$               | A factored component of $\mathcal{T}$ representing peptide detachment                                                  |
| $\hat{\mathcal{D}}^{(t)}$   | A pruned approximation of $\mathcal{D}$ at timestep $t$                                                                |
| $r$                         | Number of values of $\mathcal{O}$ kept during pruning                                                                  |
| $r_c$                       | Number of fluorophore counts of color $c$ kept during pruning                                                          |
| $r_c^{(t)}$                 | $r_c$ at time $t$                                                                                                      |
| $\bar{r}$                   | Number of amino acid counts kept during pruning                                                                        |
| $\bar{r}^{(t)}$             | $\bar{r}$ at time $t$                                                                                                  |
| $h$                         | The number of peptides selected by the kNN in the hybrid model                                                         |
| $\zeta_h$                   | The set of peptides selected by the kNN in the hybrid model                                                            |
