# Supplementary material for: Amino acid sequence assignment from single molecule peptide sequencing data using a two-stage classifier
Source: PubMed Central journal article supplement (PMC10256185; doi:10.1371/journal.pcbi.1011157), 2023-05-30
Supplement: pcbi.1011157.s005.pdf [file pcbi.1011157.s005.pdf]

## 2 Combining transition matrix factoring with HMM pruning

3 By making  $r$  suitably small, HMM pruning can exhibit better algorithmic complexity than if we factor the  
 4 transition matrix. However, we believe it is much better to combine these algorithmic enhancements  
 5 (Fig 6). To do this, we need to switch into tensor notation, replacing our matrices and vectors with the  
 6 tensor equivalents we constructed previously. This yields:

$$7 \quad \mathbf{f}_{vk}^{(t+1)} = \widehat{\mathbf{O}}_{kj}^{(t+1)} \widehat{\mathcal{T}}_{vjui}^{(t)} \mathbf{f}_{ui}^{(t)} \quad (32)$$

8 We also want to use the factorization from (26), using timestamp specific sub-tensors of each of the  
 9 factored pieces. The factorization of (26) becomes:

$$10 \quad \widehat{\mathcal{T}}_{wtui}^{(t)} = \widehat{\mathbf{D}}_{wlvk}^{(t)} \widehat{\mathcal{E}}_{vkuj}^{(t)} \widehat{\mathbf{B}}_{j_1 i_1}^{(t,1)} \widehat{\mathbf{B}}_{j_2 i_2}^{(t,2)} \dots \widehat{\mathbf{B}}_{j_c i_c}^{(t,C)} \quad (33)$$

11 Substituting into (32) gives:

$$12 \quad \mathbf{f}_{wm}^{(t+1)} = \widehat{\mathbf{O}}_{ml}^{(t+1)} \widehat{\mathbf{D}}_{wlvk}^{(t)} \widehat{\mathcal{E}}_{vkuj}^{(t)} \widehat{\mathbf{B}}_{j_1 i_1}^{(t,1)} \widehat{\mathbf{B}}_{j_2 i_2}^{(t,2)} \dots \widehat{\mathbf{B}}_{j_c i_c}^{(t,C)} \mathbf{f}_{ui}^{(t)} \quad (34)$$

13 Suppose we were to use standard sparse tensor multiplication techniques and carry this operation out  
 14 from right to left. Each tensor  $\widehat{\mathbf{B}}_{j_c i_c}^{(t,C)}$  can introduce any entry of input (index  $i_c$ ) into as many as  $\Lambda_c$   
 15 indices of output (index  $j_c$ ). The resulting computational complexity of the forward algorithm, even with  
 16 the given sparsity, is then  $O(r\alpha T \prod_{c=1}^C \Lambda_c)$ .

17 If we preprocess the computation, pruning each operation now from both directions, the algorithmic  
 18 complexity does not improve the way it does in the matrix case, although likely this would behave faster  
 19 in practice. The problem is that the pruning operation itself needs to determine which rows to  
 20 propagate forwards, which requires accessing every non-zero entry reachable in the forward direction.  
 21 Many of these values are later pruned in the backwards direction, so the computation itself has much  
 22 better sparsity, but the time to prune then dominates the algorithmic complexity result.

23 To improve this further, we add structure to the pruning of  $\widehat{\mathcal{O}}^{(t)}$ . Instead of keeping the  $r$  largest values  
 24 in  $\widehat{\mathcal{O}}^{(t)}$ , we prune each index of  $\widehat{\mathcal{O}}^{(t)}$  independently. For additional convenience, we limit each index to a  
 25 contiguous range of values. Then we let each index for any fluorophore color  $c$  have  $r_c$  values and allow  
 26  $\bar{r}$  values to index the number of amino acids. These simplifications may cause the pruning to be non-  
 27 optimal, but we accept this trade-off.

28 We can then prune our tensors using their known structures (for example, the tensors  $\widehat{\mathcal{B}}^{(t,c)}$  correspond  
 29 to an upper triangular matrix). This time when we propagate the pruning results in both directions, the  
 30 time required is only  $O(C^2)$  (the number of minimum and maximum indices to be propagated through  
 31 each tensor scales with  $C$ , as does the number of tensors to be pruned). For the runtime of the tensor  
 32 operations, consider each tensor individually.  $\widehat{\mathcal{D}}^{(t)}$  and  $\widehat{\mathcal{E}}^{(t)}$  are both highly sparse, so they contribute a  
 33 constant modification to the number of rows or columns when propagating in either direction.  $\widehat{\mathcal{D}}^{(t)}$   
 34 requires special handling. We track the detached state separately from the ordinary range, to avoid  
 35 unnecessarily including a large range of states which don't need to be.

36 Then each  $\widehat{\mathcal{B}}^{(t,c)}$  operates on an independent index, and therefore can be considered on its own. This  
 37 tensor after pruning will have dimensions that are  $O(r_c^2)$ , and should have a constant effect on the  
 38 number of elements input vs output. Therefore, each of these tensors will require an algorithmic  
 39 complexity of  $O(r_c \bar{r} \prod_{\tilde{c}=1}^c r_{\tilde{c}})$ . Bringing this all together we get an algorithmic complexity of  
 40  $O\left(C^2 + \bar{r}(\sum_{c=1}^C r_c)(\prod_{c=1}^C r_c)\right)$  for processing one timestep. The full forward algorithm then has a  
 41 complexity of  $O\left(T\left(C^2 + \bar{r}(\sum_{c=1}^C r_c)(\prod_{c=1}^C r_c)\right)\right)$ .

42 One remaining clarification is the manner of choosing  $r_c$  and  $\bar{r}$ . In fact, these values should not be kept  
 43 constant; let us refer to the values for time  $t$  as  $r_c^{(t)}$  and  $\bar{r}^{(t)}$ .  $\bar{r}^{(0)} = 1$  and  $\bar{r}^{(t+1)} = \bar{r}^{(t)} + 1$ , due to the  
 44 possibility of amino acid removal. These on average are proportional to  $\alpha$ . To get  $r_c^{(t)}$ , we keep all index

45 values where a fluorophore count of that value has the observed fluorescence intensity for color  $c$  at  
46 time  $t$  within a specified confidence interval – perhaps within  $3\sigma$  of the mean, where  $\sigma$  is the standard  
47 deviation of the distribution. These will necessarily be contiguous. The number of indices kept is then  
48  $r_c^{(t)}$ .

49 The standard deviation of a normal distribution scales with the square root of the intensity, and the  
50 number of possible index values is limited by the total possible number of fluorophores of color  $c$ . It  
51 follows that any removal of index values proportional to the standard deviation will satisfy  $r_c^{(t)} < \gamma\sqrt{\Lambda_c}$   
52 for some constant  $\gamma$  dependent on the cutoff. Then the algorithmic complexity is given by

53 
$$O\left(T\left(C^2 + \alpha\left(\sum_{c=1}^C \sqrt{\Lambda_c}\right)\left(\prod_{c=1}^C \sqrt{\Lambda_c}\right)\right)\right).$$

54 We chose a specific pruning cut-off by sweeping this parameter and balancing the experimental runtime  
55 effects and the precision-recall curves which result from simulated data.
